# Supplementary material for: Improving NO X emissions in Beijing using network observations and a novel perturbed emissions ensemble
Source: Copernicus journal article supplement (doi:10.5194/acp-2022-161), 2022-03-09
Supplement: Supplementary file 1 [file acp-2022-161-supplement.pdf]

# Improving NO<sub>x</sub> emissions in Beijing using network observations and a novel perturbed emissions ensemble

*Le Yuan<sup>1</sup>, Olalekan A.M. Popoola<sup>1</sup>, Christina Hood<sup>2</sup>, David Carruthers<sup>2</sup>, Roderic L. Jones<sup>1</sup>, Haitong Zhe Sun<sup>1</sup>, Huan Liu<sup>3</sup>, Qiang Zhang<sup>4</sup>, and Alexander T. Archibald<sup>1,5</sup>*

<sup>1</sup> Yusuf Hamied Department of Chemistry, University of Cambridge, Cambridge, CB2 1EW, UK.

<sup>2</sup> Cambridge Environmental Research Consultants, Cambridge, CB2 1SJ, UK.

<sup>3</sup> State Key Joint Laboratory of ESPC, State Environmental Protection Key Laboratory of Sources and Control of Air Pollution Complex, International Joint Laboratory on Low Carbon Clean Energy Innovation, School of the Environment, Tsinghua University, Beijing, 100086, China.

<sup>4</sup> Ministry of Education Key Laboratory for Earth System Modeling, Department of Earth System Science, Tsinghua University, Beijing, 100086, China.

<sup>5</sup> National Centre for Atmospheric Science, Cambridge, CB2 1EW, UK.

*Correspondence to:* Alexander T. Archibald (ata27@cam.ac.uk)

### S1. Initial PEE simulations

The initial PEE was constructed using uncertainty ranges determined from the expert elicitation (see Table 1, column *Initial PEE*). The simulations were forced with the same meteorological data and background concentrations of NO and TVOC as the optimised PEE simulations (see Section 2.3). For background NO<sub>2</sub> and O<sub>3</sub>, we used baseline concentrations from the long-term monitoring network, defined as the 10<sup>th</sup> percentile of all values measured in a moving 3-hour window. The difficulties in defining a spatially uniform regional background NO<sub>2</sub> and O<sub>3</sub> are discussed in Section 2.3 and the model sensitivity to different definitions are examined in Section 4.

Figure S1 shows the normalised mean bias factor (NMBF) in NO<sub>2</sub> concentrations output by the initial PEE simulations. The NMBF is an intuitive yet robust measure of the mean magnitude of the factor by which the model outputs differ from the observations and its sense (Yu et al., 2006). It is defined as:

$$\begin{aligned} NMBF &= \frac{\overline{Mod}}{\overline{Obs}} - 1, \text{ if } \overline{Mod} \geq \overline{Obs} \\ &= 1 - \frac{\overline{Obs}}{\overline{Mod}}, \text{ if } \overline{Mod} < \overline{Obs} \end{aligned}$$

where  $\overline{Mod}$  and  $\overline{Obs}$  represent the means of the modelled and observed values, respectively. As can be seen from Fig. S1, there is a widespread overestimation of annual mean NO<sub>2</sub> concentrations across the long-term monitoring network, spanning different site types. In some simulations, the overestimation is above a factor of 2 (calculated as NMBF+1, when the NMBF is positive) at a few urban sites. More importantly, the entire ensemble of simulations overestimates the annual mean NO<sub>2</sub> concentrations at 19 sites. This is an indication that NO<sub>x</sub> emissions are generally high biased in the initial PEE.

The modelled annual mean diurnal variations of NO<sub>2</sub> concentrations are often much higher than those observed (Fig. S2), providing further indications of a high bias in the NO<sub>x</sub> emissions. In addition, the modelled diurnal profiles at most sites are characterised by two peaks that coincide with the peak traffic periods, while such peaks are less distinct, if not completely absent in the observed profiles. This suggests specifically that the transport sector NO<sub>x</sub> emissions are overestimated.

In summary, the initial PEE simulations failed to produce sufficient modelled concentrations comparable to the observations, such that the elicited uncertainty ranges in NO<sub>x</sub> emissions could not be reduced. Hence, we constructed an optimised PEE described in Section 2.2.

**Table S1.** Long-term air quality monitoring sites in operation in 2016 and located within the modelling domain.

| Name           | Acronym | Longitude (°E) | Latitude (°N) | Type                     |
|----------------|---------|----------------|---------------|--------------------------|
| Dongsi         | DS      | 116.417        | 39.929        | Urban site               |
| Tiantan        | TT      | 116.407        | 39.886        | Urban site               |
| Guanyuan       | GY      | 116.339        | 39.929        | Urban site               |
| Wanshouxigong  | WSXG    | 116.352        | 39.878        | Urban site               |
| Aotizhongxin   | ATZX    | 116.397        | 39.982        | Urban site               |
| Nongzhanguan   | NZG     | 116.461        | 39.937        | Urban site               |
| Wanliu         | WL      | 116.287        | 39.987        | Urban site               |
| Beibuxinqu     | BBXQ    | 116.174        | 40.09         | Urban site               |
| Zhiwuyuan      | ZWY     | 116.207        | 40.002        | Urban site               |
| Fengtaihuayuan | FTHY    | 116.279        | 39.863        | Urban site               |
| Yungang        | YG      | 116.146        | 39.824        | Urban site               |
| Gucheng        | GC      | 116.184        | 39.914        | Urban site               |
| Qianmen        | QM      | 116.395        | 39.899        | Traffic monitoring site  |
| Yongdingmennei | YDMN    | 116.394        | 39.876        | Traffic monitoring site  |
| Xizhimenbei    | XZMB    | 116.349        | 39.954        | Traffic monitoring site  |
| Nansanhuan     | NSH     | 116.368        | 39.856        | Traffic monitoring site  |
| Dongsihuan     | DSH     | 116.483        | 39.939        | Traffic monitoring site  |
| Fangshan       | FS      | 116.136        | 39.742        | Suburban site            |
| Daxing         | DX      | 116.404        | 39.718        | Suburban site            |
| Yizhuang       | YZ      | 116.506        | 39.795        | Suburban site            |
| Tongzhou       | TZ      | 116.663        | 39.886        | Suburban site            |
| Shunyi         | SY      | 116.655        | 40.127        | Suburban site            |
| Changping      | CP      | 116.23         | 40.217        | Suburban site            |
| Mentougou      | MTG     | 116.106        | 39.937        | Suburban site            |
| Pinggu         | PG      | 117.1          | 40.143        | Suburban site            |
| Huairou        | HR      | 116.628        | 40.328        | Suburban site            |
| Miyun          | MY      | 116.832        | 40.37         | Suburban site            |
| Dingling       | DL      | 116.22         | 40.292        | Clean site               |
| Badaling       | BDL     | 115.988        | 40.365        | Regional background site |
| Donggaocun     | DGC     | 117.12         | 40.1          | Regional background site |
| Yongledian     | YLD     | 116.783        | 39.712        | Regional background site |
| Yufa           | YF      | 116.3          | 39.52         | Regional background site |
| Liulihe        | LLH     | 116            | 39.58         | Regional background site |

**Table S2.** Low-cost SNAQ (Sensor Network for Air Quality) deployed for near-surface measurement within the modelling domain during the APHH-Beijing winter campaign (November-December 2016).

| ID     | Longitude (°E) | Latitude (°N) |
|--------|----------------|---------------|
| SNAQ03 | 117.393        | 40.164        |
| SNAQ04 | 117.423        | 40.164        |
| SNAQ07 | 117.419        | 40.163        |
| SNAQ10 | 116.367        | 39.970        |
| SNAQ12 | 117.405        | 40.166        |
| SNAQ15 | 116.402        | 39.750        |
| SNAQ16 | 116.425        | 39.942        |
| SNAQ17 | 116.395        | 39.981        |
| SNAQ21 | 116.391        | 40.272        |
| SNAQ22 | 116.360        | 39.830        |
| SNAQ23 | 116.557        | 39.746        |
| SNAQ25 | 116.300        | 39.968        |
| SNAQ26 | 116.661        | 40.360        |
| SNAQ28 | 116.318        | 39.621        |
| SNAQ29 | 116.363        | 39.978        |
| SNAQ31 | 116.492        | 39.997        |
| SNAQ34 | 116.233        | 39.642        |
| SNAQ35 | 116.414        | 40.128        |
| SNAQ36 | 116.680        | 40.396        |
| SNAQ37 | 116.428        | 40.158        |
| SNAQ38 | 116.273        | 39.725        |
| SNAQ39 | 116.371        | 39.974        |

**Table S3.** Different definitions of background concentrations of NO<sub>2</sub> and O<sub>3</sub> used in the background sensitivity simulations. Upwind concentration refers to the inverse distance weighted mean concentration of the two clean or regional background sites in the upwind direction of each hour. 10<sup>th</sup> and 90<sup>th</sup> percentile concentrations refer to the 10<sup>th</sup> and 90<sup>th</sup> concentration of all sites in a moving 3-h window. In the optimised PEE simulations, upwind concentration is used for both background NO<sub>2</sub> and O<sub>3</sub>.

| Background sensitivity simulations | Background NO <sub>2</sub>                | Background O <sub>3</sub>                 |
|------------------------------------|-------------------------------------------|-------------------------------------------|
| S1                                 | Upwind concentration                      | 90 <sup>th</sup> percentile concentration |
| S2                                 | Upwind concentration                      | 10 <sup>th</sup> percentile concentration |
| S3                                 | 10 <sup>th</sup> percentile concentration | Upwind concentration                      |
| S4                                 | 10 <sup>th</sup> percentile concentration | 90 <sup>th</sup> percentile concentration |
| S5                                 | 10 <sup>th</sup> percentile concentration | 10 <sup>th</sup> percentile concentration |

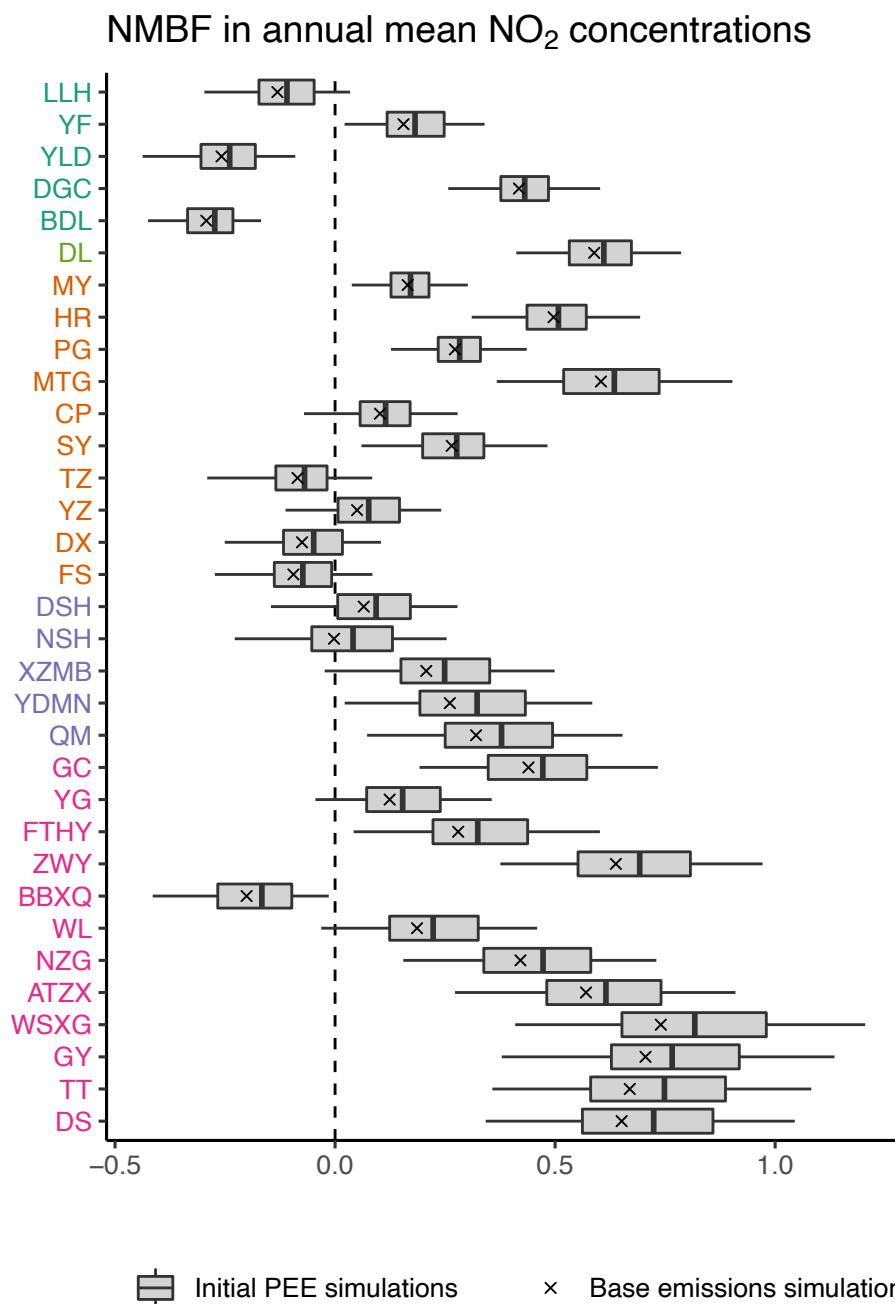

**Figure S1.** Distribution of the normalised mean bias factors (NMBF) in annual mean NO<sub>2</sub> concentrations associated with the initial perturbed emissions ensemble (PEE) simulations and the simulation forced with the base emissions at each long-term monitoring site. The monitoring sites are colour-coded according to the site type: urban site (magenta), traffic monitoring site (purple), suburban site (orange), clean site (light green) and regional background site (green).

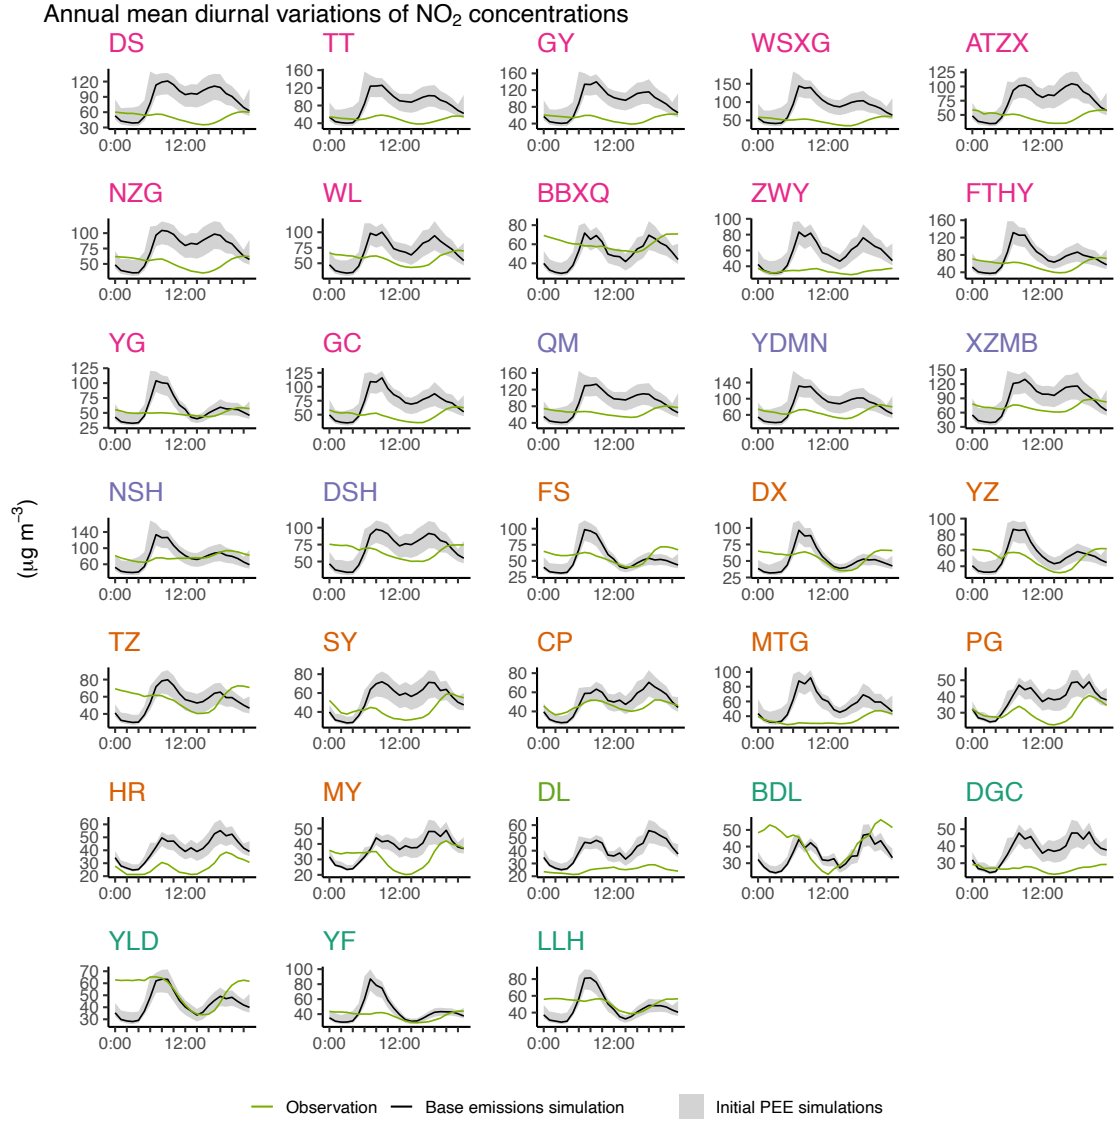

**Figure S2.** Annual mean diurnal variations of NO<sub>2</sub> concentrations simulated with the initial perturbed emissions ensemble (PEE) and with the base emissions, compared to the observations at each long-term monitoring site. The monitoring sites are colour-coded according to the site type: urban site (magenta), traffic monitoring site (purple), suburban site (orange), clean site (light green) and regional background site (green). Note the different scales on the y-axis used in the panels.

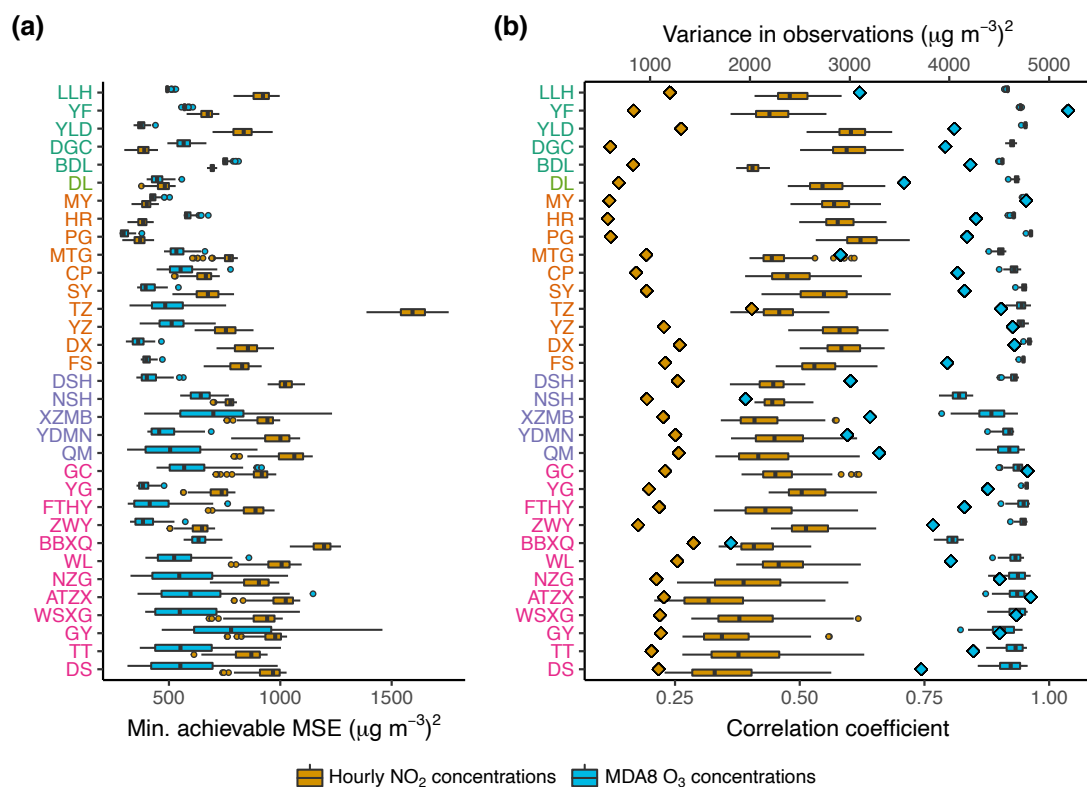

**Figure S3.** Distribution of (a) the minimum achievable mean square errors (MSE) and (b) the Pearson's correlation coefficient in hourly  $\text{NO}_2$  concentrations and daily maximum 8-hour mean (MDA8)  $\text{O}_3$  concentrations associated with the optimised perturbed emissions ensemble simulations at each long-term monitoring site. The observed variance in hourly  $\text{NO}_2$  concentrations and MDA8  $\text{O}_3$  concentrations are also shown in panel (b) by diamond symbols against the secondary x-axis (at the top). The monitoring sites are colour-coded according to the site type: urban site (magenta), traffic monitoring site (purple), suburban site (orange), clean site (light green) and regional background site (green). Note the different scales on the y-axis used in the panels.



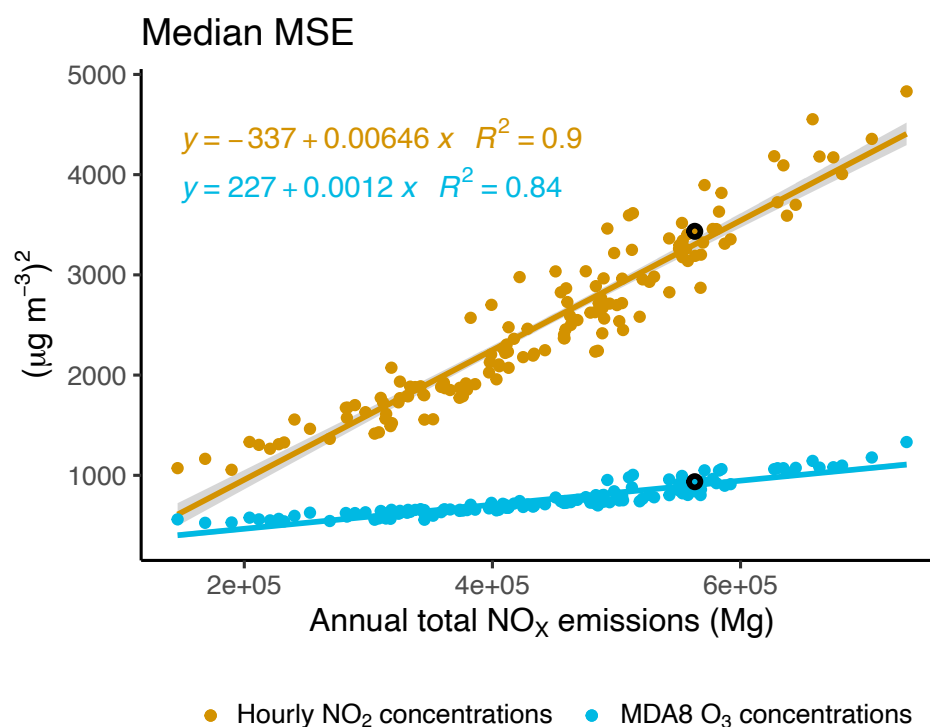

**Figure S4.** Median mean square errors (MSE) in hourly NO<sub>2</sub> concentrations and daily maximum 8-hour mean (MDA8) O<sub>3</sub> concentrations associated with the optimised perturbed emissions ensemble (PEE) simulations and the base run (marked with black strokes), as a function of the input annual total NO<sub>x</sub> emissions. The fitted linear regression models and the coefficients of determination ( $R^2$ ) are shown in the corresponding colour. The confidence intervals are shown by grey shading.

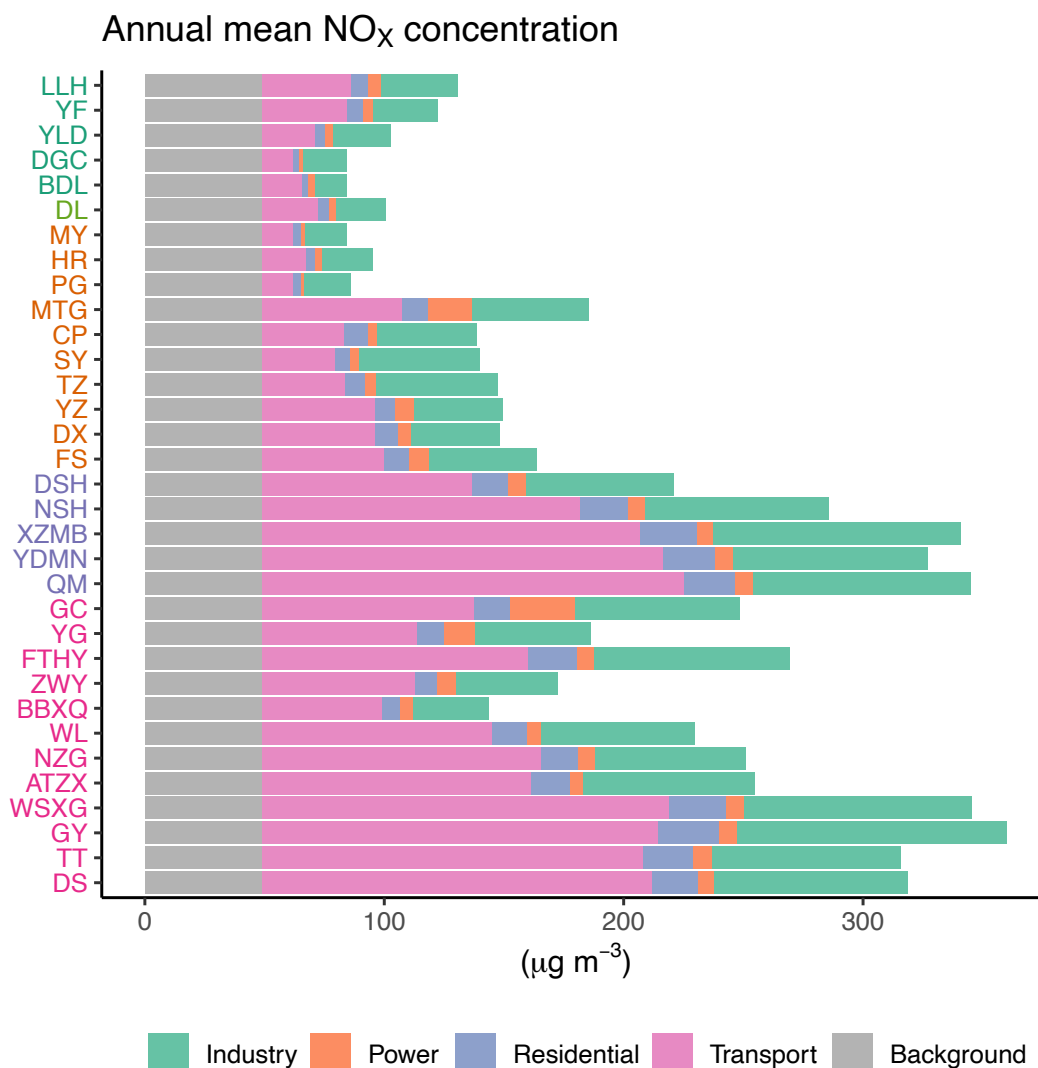

**Figure S5.** Annual mean NO<sub>x</sub> concentrations at each long-term monitoring site simulated with the base emissions, shown as contributions of NO<sub>x</sub> emissions from individual source sectors and the input background concentration. Chemistry calculations were disabled in the source apportionment, thus it is more meaningful to examine concentrations of NO<sub>x</sub> than those of NO<sub>2</sub>. NO<sub>x</sub> concentrations (in mass units) are calculated by assuming that 100% of the NO<sub>x</sub> is NO<sub>2</sub>. The monitoring sites are colour-coded according to the site type: urban site (magenta), traffic monitoring site (purple), suburban site (orange), clean site (light green) and regional background site (green).

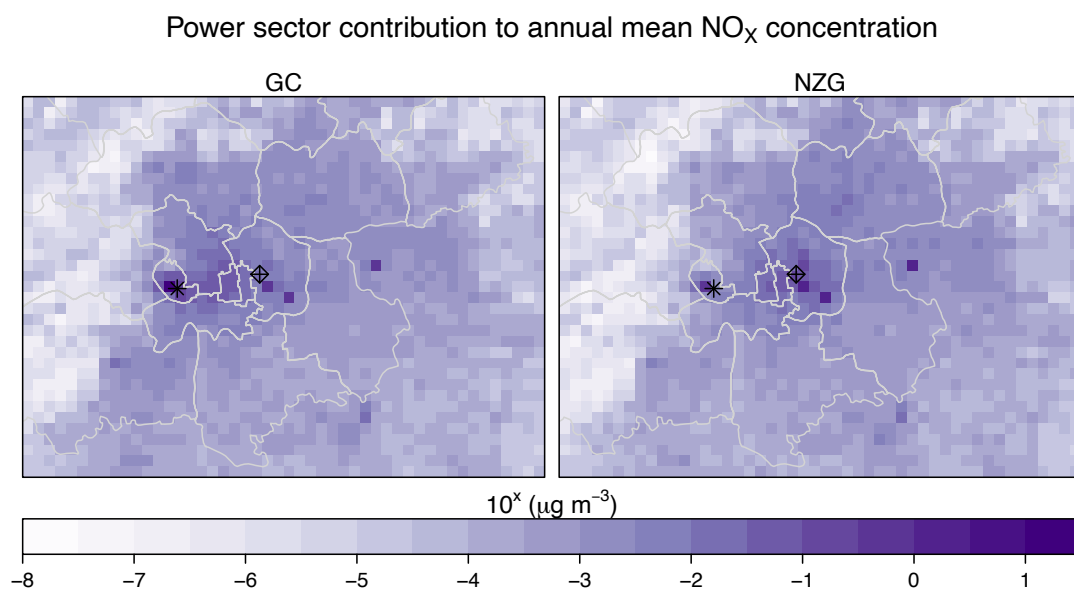

**Figure S6.** Contribution of the power sector NO<sub>x</sub> emissions from each grid cell to the annual mean NO<sub>x</sub> concentrations at the sites GC (circled plus symbol) and NZG (diamond plus symbol) in the base run. The contributions are log transformed (base 10) due to a strong positive skewness (i.e. the colour scale shows the exponent). NO<sub>x</sub> concentrations (in mass units) are calculated by assuming that 100% of the NO<sub>x</sub> is NO<sub>2</sub>.

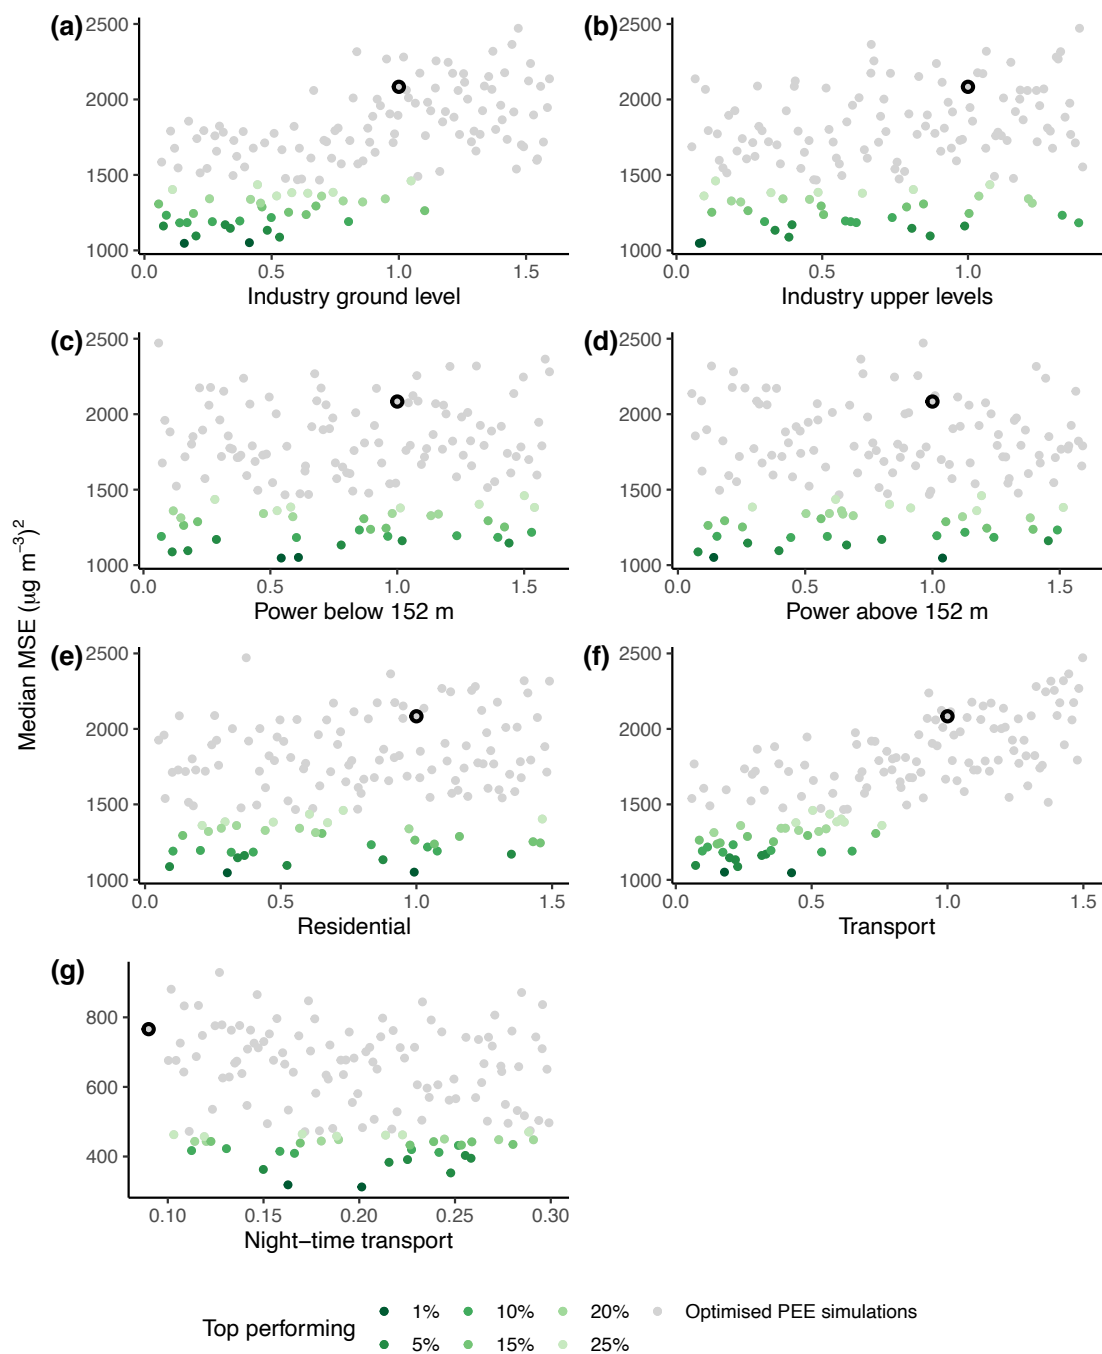

**Figure S7.** Average performance of the optimised perturbed emissions ensemble (PEE) simulations and the base run (marked with black strokes) as a function of emission parameter values. The scales on the x-axes correspond to the uncertainty ranges in Table 1. The top performing 25%, 20%, 15%, 10%, 5% and 1% of the simulations are coloured in a darkening green shade, as measured by their median mean square errors (MSE) in hourly  $\text{NO}_2$  concentrations at the SNAQ sites across the modelling domain in all panels except in (g), where median mean square errors in the mean diurnal variations of  $\text{NO}_2$  concentrations (during the campaign period) are used (note the different scale on the y-axis).

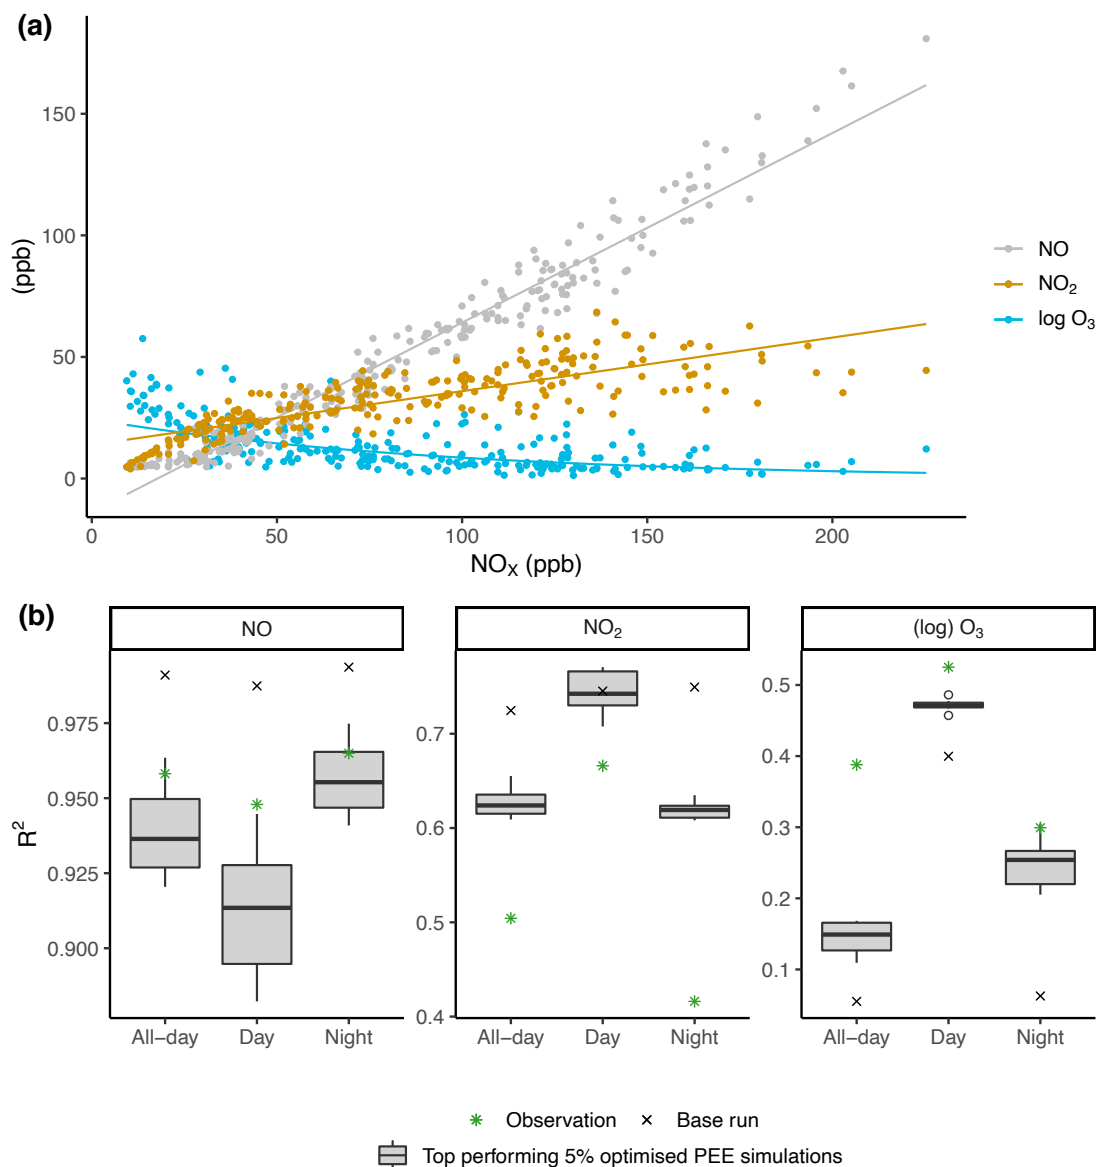

**Figure S8.** (a) Observed mixing ratios of NO, NO<sub>2</sub> and log transformed O<sub>3</sub> as a simple linear function of NO<sub>x</sub> mixing ratios at all SNAQ sites. Daily mean mixing ratios are shown for clarity, but the models are fitted to hourly data. (b) Distributions of the coefficients of determination ( $R^2$ ) of the linear regression models fitted between hourly mixing ratios of NO, NO<sub>2</sub>, log transformed O<sub>3</sub> and those of NO<sub>x</sub> output at all SNAQ sites by the top performing 5% of the optimised perturbed emissions ensemble (PEE) simulations and the base run, compared to the corresponding  $R^2$  values of the models fitted to the SNAQ measurements. Daytime is defined as complete hours between sunrise and sunset in Beijing during November-December 2016, namely 8:00-15:00 local time.
